# Supplementary material
Source: ML conference proceedings conference paper supplement (https://proceedings.neurips.cc/paper_files/paper/2007/hash/8757150decbd89b0f5442ca3db4d0e0e-Abstract.html)
Supplement: Supplementary file 1 [file 8757150decbd89b0f5442ca3db4d0e0e-Supplemental.zip]

Archive with 3 entries (3 files):
- adaptive_bayesian_inference/nips2007finalSubmit.pdf
- adaptive_bayesian_inference/spotlight.mp3
- adaptive_bayesian_inference/spotlight.pdf
