# Supplementary material
Source: ML conference proceedings conference paper supplement (https://proceedings.neurips.cc/paper_files/paper/2007/hash/8757150decbd89b0f5442ca3db4d0e0e-Abstract.html)
Supplement: Supplementary file 1 [file 8757150decbd89b0f5442ca3db4d0e0e-Supplemental.zip › adaptive_bayesian_inference/spotlight.pdf]

# Adaptive Bayesian Inference (W16)

Umut A. Acar

Alexander T. Ihler

Ramgopal R. Mettu

Özgür Sümer

Input Factor Tree

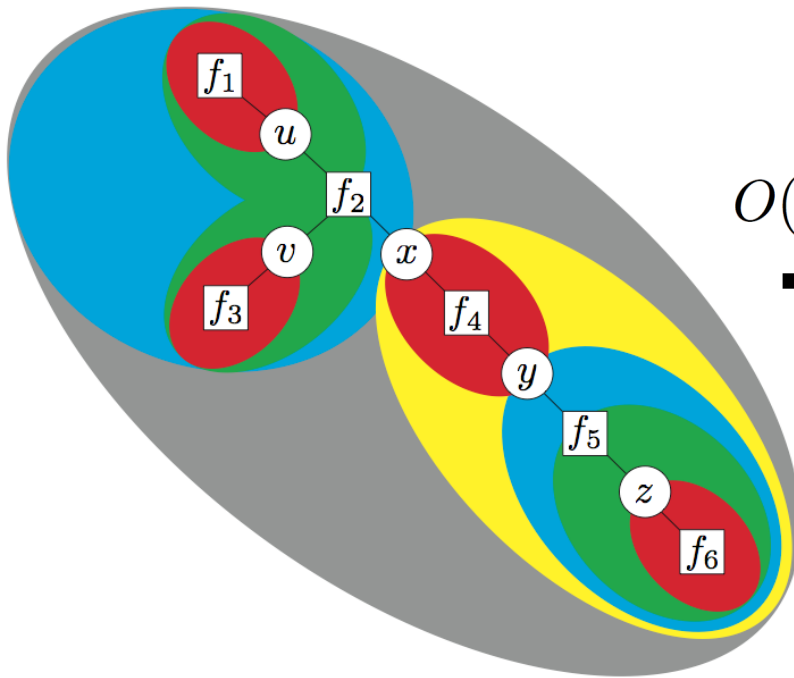

Updates to CPDs/structure:  $O(1)$

Marginal queries:  $O(n)$

$O(n)$  preprocessing

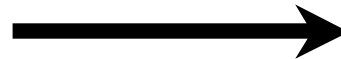

Balanced Cluster Tree

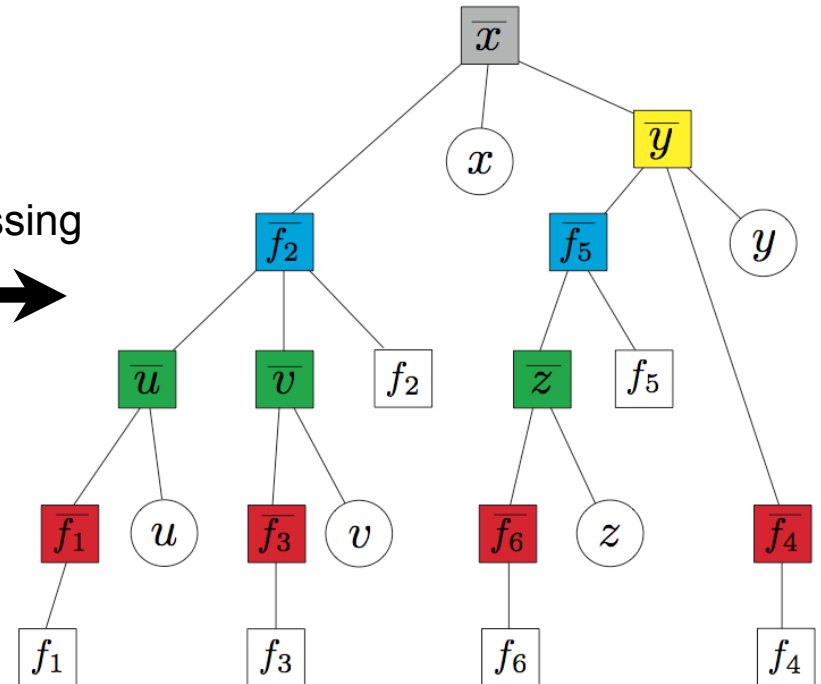

Updates to CPDs/structure:  $O(\log_2 n)$

Marginal queries:  $O(\log_2 n)$

Yields 10-100x speedup for applications where updates are frequent (e.g. computational biology).
